# Supplementary material for: Nasopharyngeal Lymphoma: A 22-Year Review of 35 Cases
Source: PubMed Central journal article supplement (PMC6833098; doi:10.3390/jcm8101604), 2019-10-03
Supplement: jcm-08-01604-s001.pdf [file jcm-08-01604-s001.pdf]

**Supplementary Table S1. Characteristics of Stage IV NP lymphoma patients**

| <b>No.</b> | <b>Age/Sex</b> | <b>Pathology</b>     | <b>EBER</b> | <b>Other involved sites</b>                                                                  | <b>Survival (Months)</b> |
|------------|----------------|----------------------|-------------|----------------------------------------------------------------------------------------------|--------------------------|
| 1          | 62/M           | Mantle cell lymphoma | -           | *GI tract, *bone marrow, mediastinum, retroperitoneum, spleen, mesentery,                    | 6.2                      |
| 2          | 50/F           | DLBCL                | +           | Tonsil, neck LN, , mediastinum, lung, stomach, retroperitoneum, pelvic and *inguinal regions | 34.3                     |
| 3          | 56/F           | PTLD                 | +           | Left thigh, lung, abdomen                                                                    | 0.8                      |
| 4          | 88/F           | DLBCL                | +           | Lung, pelvic, *inguinal region, left deltoid                                                 | 91.9                     |
| 5          | 50/M           | DLBCL                | NA          | Inguinal region, submandibular, paraaortic, retroperitoneum, left external iliac chain       | 12.1                     |
| 6          | 17/M           | DLBCL                | -           | Axillary, mediastinum, retroperitoneal, inguinal LN, bone marrow                             | 161.4                    |
| 7          | 72/F           | DLBCL                | +           | NA                                                                                           | 50.8                     |
| 8          | 81/M           | NKTCL                | NA          | Lung, abdomen                                                                                | 0.9                      |

Abbreviations: DLBCL: diffuse large B cell lymphoma; EBER: Epstein–Barr virus-encoded small RNAs; LN: lymph nodes; NA: not available; NP: nasopharynx; NKTCL: NK/T cell lymphoma; PTLD: post-transplant lymphoproliferative disorder

\* Biopsy-proven pathology

Supplementary Table S2. IHC and subtypes of NP DLBCL patients

| No. | CD10 | BCL-6 | MUM1 | Subtype | Survival<br>(Months) | CNS involvement | EBER |
|-----|------|-------|------|---------|----------------------|-----------------|------|
| 1   | -    | +     | +    | Non-GCB | 34.3                 | -               | +    |
| 2   | -    | +     | +    | Non-GCB | 20.6                 | -               | -    |
| 3   | -    | +     | +    | Non-GCB | 36.8                 | -               | -    |
| 4   | -    | +     | +    | Non-GCB | 50.3                 | -               | +    |
| 5   | -    | +     | +    | Non-GCB | 63.7                 | -               | -    |
| 6   | -    | +     | NA   | NA      | 91.9                 | -               | +    |
| 7   | -    | +     | NA   | NA      | 73.1                 | -               | -    |
| 8   | -    | -     | NA   | Non-GCB | 0.7                  | -               | +    |
| 9   | -    | +     | NA   | NA      | 2.1                  | -               | -    |
| 10  | +    | +     | NA   | GCB     | 12.1                 | -               | NA   |
| 11  | -    | +     | +    | Non-GCB | 23.0                 | -               | -    |
| 12  | NA   | NA    | NA   | NA      | 161.4                | -               | -    |
| 13  | -    | +     | NA   | NA      | 56.0                 | -               | -    |
| 14  | NA   | NA    | NA   | NA      | 50.8                 | -               | +    |
| 15  | NA   | NA    | NA   | NA      | 174.5                | -               | -    |
| 16  | -    | +     | NA   | NA      | 13.0                 | -               | -    |
| 17  | NA   | NA    | NA   | NA      | 149.3                | -               | -    |

Abbreviations: DLBCL: diffuse large B cell lymphoma; GCB: germinal center B-cell; EBER: Epstein–Barr virus-encoded small RNAs; NA: not available
